# Supplementary material for: Red phosphor based on Eu3+-isoelectronically doped Ba2SiO4 obtained via sol–gel route for solid state lightning
Source: Royal Society of Chemistry journal article supplement (doi:10.1039/c7ra10494d), 2017-01-01
Supplement: c7ra10494d1.pdf [file c7ra10494d1.pdf]

## Electronic supplementary material

### **Red phosphor based on $\text{Eu}^{3+}$ - isoelectronically doped $\text{Ba}_2\text{SiO}_4$ obtained via sol-gel route for solid state lightning.**

Airton G. B. Junior<sup>a,b</sup>, Diego A. Ceccato<sup>a,b</sup>, Sergio A. M. Lima<sup>a,b</sup> and Ana. M. Pires<sup>a,b,\*</sup>

*<sup>a</sup>São Paulo State University (Unesp), School of Technology and Sciences, Presidente Prudente, SP 19060-900, Brazil.*

*<sup>b</sup>São Paulo State University (Unesp), Institute of Biosciences, Humanities and Exact Sciences, São José do Rio Preto SP, 15054-000, Brazil.*

\*Ana Maria Pires

Address:

São Paulo State University (Unesp), School of Technology and Sciences, R. Roberto Simonsen, 305, 19060-900 – Presidente Prudente/SP – Brazil.

E-mail: [anapires@fct.unesp.br](mailto:anapires@fct.unesp.br)

Tel: +55 1832295748

## Experimental procedure

**Table ES1.** Doping proportions and amount of reagents added, assuming 2.0000 g of the product. The  $\text{Eu}^{3+}$  concentration was isoelectronically varied from 1 to 5 %, i.e., keeping equivalent positive and negative charges according to the sum of cation charges and  $\text{SiO}_4^{4-}$  charges ( $3n_{\text{Eu}^{3+}} + 2n_{\text{Ba}^{2+}} = +4$ , where  $n_{\text{Ba}^{2+}}$  and  $n_{\text{Eu}^{3+}}$  are the mol amount of  $\text{Ba}^{2+}$  and  $\text{Eu}^{3+}$ , respectively).

| % [a]   | Eu <sup>3+</sup> doping |         | Structural formula                                     | Molecular weight / g/mol | Ba <sup>2+</sup> acetate mass (g) | Volume (mL)               |        |
|---------|-------------------------|---------|--------------------------------------------------------|--------------------------|-----------------------------------|---------------------------|--------|
|         | at % [b]                | ch% [c] |                                                        |                          |                                   | Eu <sup>3+</sup> acetate* | TEOS** |
| 5 %     | 5.13 at%                | 7.5 ch% | Ba <sub>1.85</sub> Eu <sub>0.1</sub> SiO <sub>4</sub>  | 361.4125                 | 2.6149                            | 11.07                     | 10.06  |
| 4%      | 4.08 at%                | 6 ch%   | Ba <sub>1.88</sub> Eu <sub>0.08</sub> SiO <sub>4</sub> | 362.4944                 | 2.6494                            | 8.83                      | 10.03  |
| 3 %     | 3.05 at%                | 4.5 ch% | Ba <sub>1.91</sub> Eu <sub>0.06</sub> SiO <sub>4</sub> | 363.5763                 | 2.6836                            | 4.66                      | 10.00  |
| 2 %     | 2.02 at%                | 3 ch%   | Ba <sub>1.94</sub> Eu <sub>0.04</sub> SiO <sub>4</sub> | 364.6582                 | 2.7175                            | 4.39                      | 9.97   |
| 1 %     | 1.00 at%                | 1.5 ch% | Ba <sub>1.97</sub> Eu <sub>0.02</sub> SiO <sub>4</sub> | 365.7401                 | 2.7517                            | 2.19                      | 9.94   |
| Undoped | -                       | -       | Ba <sub>2</sub> SiO <sub>4</sub>                       | 366.8220                 | 2.7852                            | -                         | 9.91   |

[a] Eu<sup>3+</sup>-doping percentage in relation to 2 mols of Ba<sup>2+</sup> in the undoped Ba<sub>2</sub>SiO<sub>4</sub>. [b] Eu<sup>3+</sup>-doping percentage in relation to the total cation mol amount for each sample; [c] Eu<sup>3+</sup>-doping percentage in relation to the total cation charge in each sample.

\*0.05 mol.L<sup>-1</sup> in acetic acid solution

\*\*0.55 mol.L<sup>-1</sup> in isopropyl alcohol solution.

**Table ES2**

Table ES2. The full width at half maximum, position, band area and height for the ( $\nu_1$ )  $\nu_s$  and ( $\nu_3$ )  $\nu_{as}$  vibrational mode in the Raman spectra for the undoped and doped-phosphors.

| <b>Band</b>                                                         | <b>Area / arb. units</b> | <b>Position/cm<sup>-1</sup></b> | <b>FWHM/cm<sup>-1</sup></b> | <b>Height/arb. units</b> |
|---------------------------------------------------------------------|--------------------------|---------------------------------|-----------------------------|--------------------------|
| <b>5 %</b>                                                          |                          |                                 |                             |                          |
| <b>(<math>\nu_1</math>) <math>\nu_s</math> (SiO<sub>4</sub>)</b>    | 117411                   | 822                             | 7                           | 10471                    |
|                                                                     | 44141                    | 856                             | 12                          | 2331                     |
| <b>(<math>\nu_3</math>) <math>\nu_{as}</math> (SiO<sub>4</sub>)</b> | 12893                    | 885                             | 10                          | 749                      |
|                                                                     | 25576                    | 909                             | 10                          | 1530                     |
| <b>4 %</b>                                                          |                          |                                 |                             |                          |
| <b>(<math>\nu_1</math>) <math>\nu_s</math> (SiO<sub>4</sub>)</b>    | 180867                   | 822                             | 7                           | 15440                    |
|                                                                     | 59486                    | 857                             | 11                          | 3236                     |
| <b>(<math>\nu_3</math>) <math>\nu_{as}</math> (SiO<sub>4</sub>)</b> | 29749                    | 885                             | 16                          | 1158                     |
|                                                                     | 41930                    | 909                             | 11                          | 2314                     |
| <b>3 %</b>                                                          |                          |                                 |                             |                          |
| <b>(<math>\nu_1</math>) <math>\nu_s</math> (SiO<sub>4</sub>)</b>    | 113725                   | 822                             | 8                           | 8207                     |
|                                                                     | 40250                    | 857                             | 13                          | 1945                     |
| <b>(<math>\nu_3</math>) <math>\nu_{as}</math> (SiO<sub>4</sub>)</b> | 18011                    | 885                             | 14                          | 766                      |
|                                                                     | 38062                    | 909                             | 16                          | 1439                     |
| <b>2 %</b>                                                          |                          |                                 |                             |                          |
| <b>(<math>\nu_1</math>) <math>\nu_s</math> (SiO<sub>4</sub>)</b>    | 172552                   | 822                             | 8                           | 12325                    |
|                                                                     | 59749                    | 857                             | 13                          | 2957                     |
| <b>(<math>\nu_3</math>) <math>\nu_{as}</math> (SiO<sub>4</sub>)</b> | 36740                    | 885                             | 17                          | 1310                     |
|                                                                     | 55204                    | 909                             | 16                          | 2156                     |
| <b>1 %</b>                                                          |                          |                                 |                             |                          |
| <b>(<math>\nu_1</math>) <math>\nu_s</math> (SiO<sub>4</sub>)</b>    | 298999                   | 822                             | 7                           | 25199                    |
|                                                                     | 95598                    | 857                             | 11                          | 5250                     |
| <b>(<math>\nu_3</math>) <math>\nu_{as}</math> (SiO<sub>4</sub>)</b> | 50187                    | 885                             | 16                          | 1928                     |
|                                                                     | 76444                    | 909                             | 12                          | 3796                     |
| <b>Undoped</b>                                                      |                          |                                 |                             |                          |
| <b>(<math>\nu_1</math>) <math>\nu_s</math> (SiO<sub>4</sub>)</b>    | 215292                   | 822                             | 6                           | 20913                    |
|                                                                     | 65351                    | 857                             | 10                          | 4093                     |
| <b>(<math>\nu_3</math>) <math>\nu_{as}</math> (SiO<sub>4</sub>)</b> | 26499                    | 885                             | 11                          | 1533                     |
|                                                                     | 46811                    | 909                             | 10                          | 3036                     |

### **Crystallite size determination by Scherrer method.**

The crystallite size was determined according to Equation ES1.<sup>1</sup>

$$\beta_p = \frac{c\lambda}{\varepsilon \cos\theta} \text{(Equation ES1)}$$

Where  $\beta_p$  is the full width at half maximum in radians of a given  $h k l$  reflection peak,  $\varepsilon$ , in the corresponding direction to the  $(h k l)$  and  $c$  is a constant that depends on the reflection symmetry which usually is given as 0.9 for non-spherical crystallite. To calculate the sample's crystallite size the three most intense peaks observed in the diffraction pattern related to the (1 2 1), (2 1 1) and (0 3 1) planes were considered.

**Figure ES1**

**Figure ES1.** Scanning electron microscopy images of undoped and  $\text{Eu}^{3+}$ -doped  $\text{Ba}_2\text{SiO}_4$  prepared by the sol-gel method.

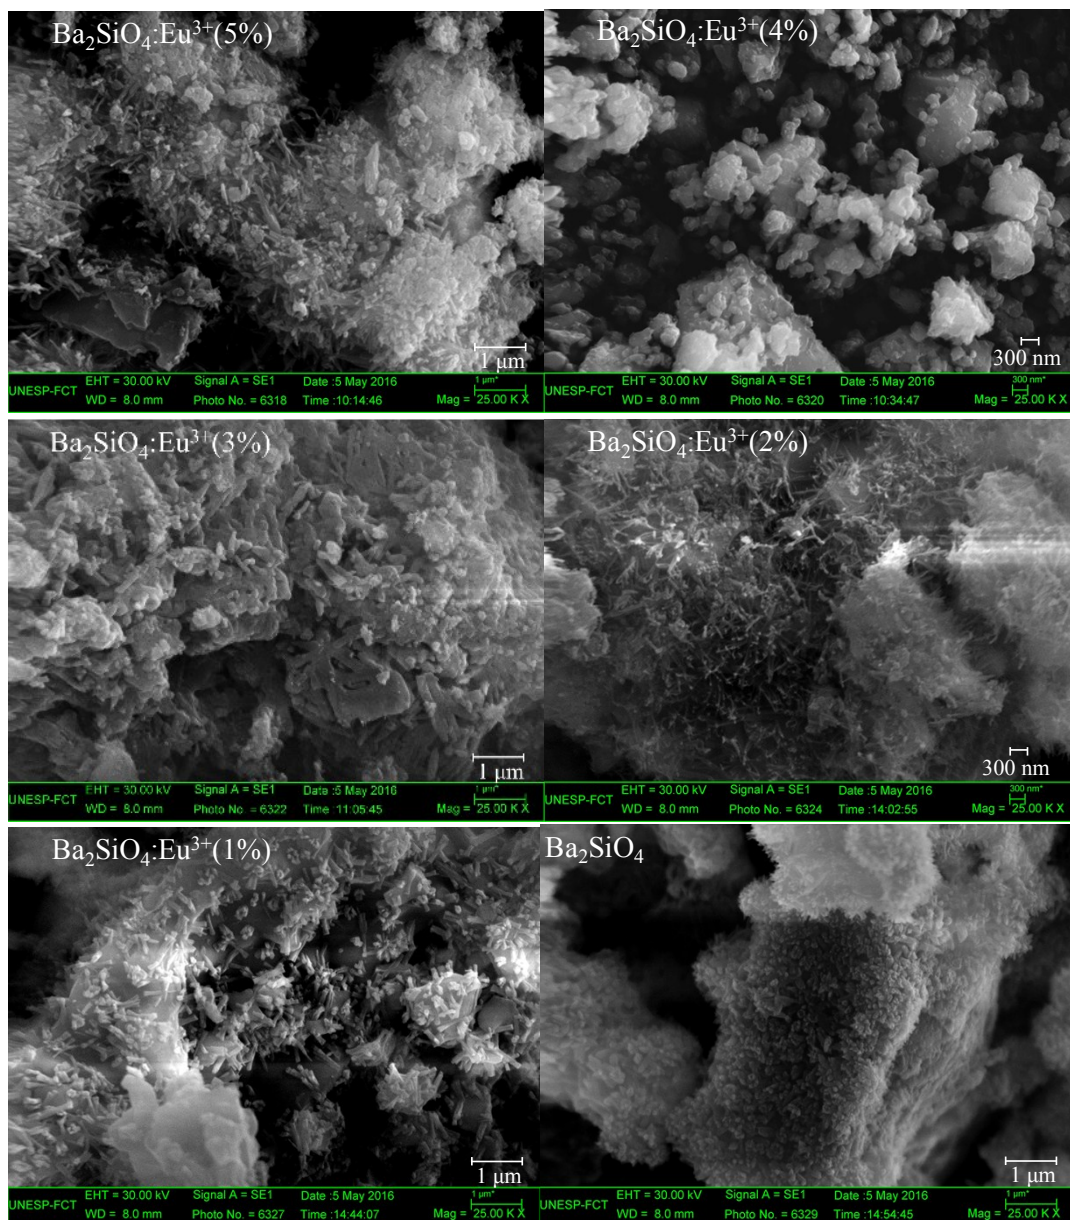

## Figure ES2

**Figure ES2.** (a) Energy Dispersive Spectroscopy (EDS) for  $\text{Eu}^{3+}$ -doped  $\text{Ba}_2\text{SiO}_4$ <sup>[a]</sup> and (b) chemical mapping by EDS.

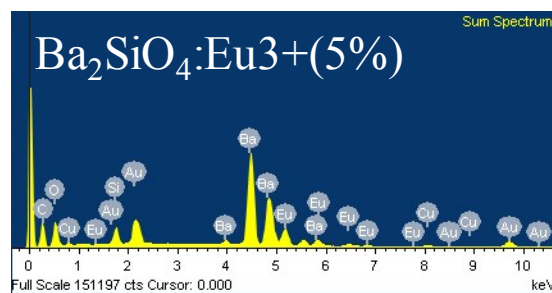

[a] The phosphor was analyzed by energy dispersive spectroscopy (X OXFORD *Instruments* model INCAx-act) to identify elements on the particle surfaces. The elements Ba, Eu, Si and O observed are from the  $\text{Ba}_2\text{SiO}_4:\text{Eu}^{3+}$  phase, the element Au was used to metalize the sample and the element C attributed to the formation of amorphous carbonate on the particles surface, as it is discussed in the FTIR results.

**Figure ES3**

**Figure ES3.** Chemical mapping by EDS for  $\text{Ba}_2\text{SiO}_4:\text{Eu}^{3+}(5\%)$ <sup>[a]</sup>.

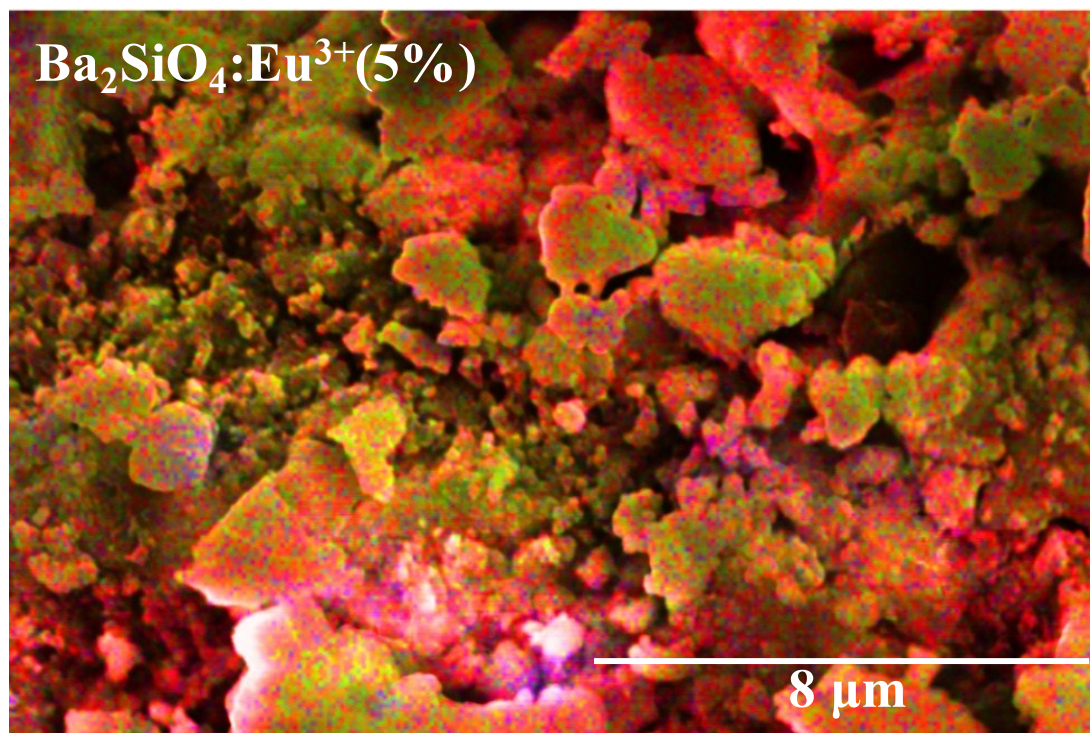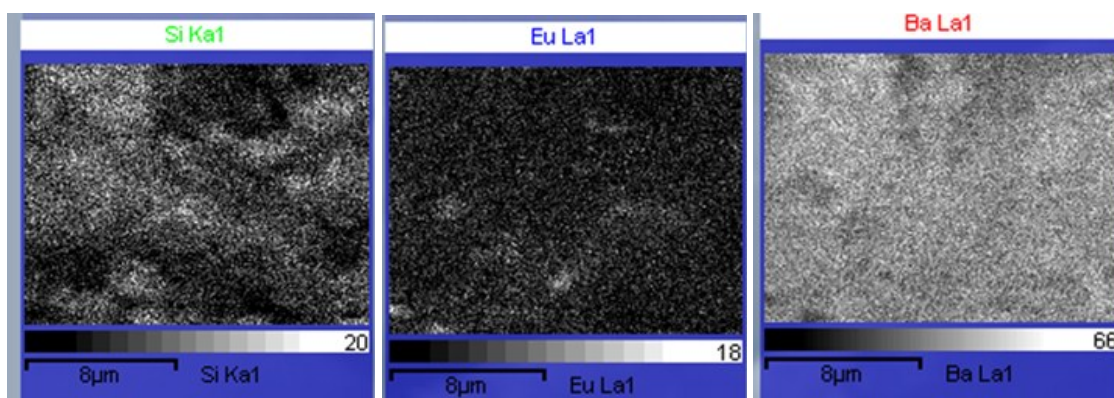

[a] Chemical mapping obtained by EDS showing the homogeneous distribution of the elements Ba, Eu and Si in an agglomerate of particles. The element Ba is shown in red, Si in green and Eu in blue. Also, the homogeneous distribution can be seen at the bottom of the figure.



**Figure ES4**

**Figure ES4.** Bandgap calculation for undoped and  $\text{Eu}^{3+}$ -doped  $\text{Ba}_2\text{SiO}_4$  prepared by sol-gel method.

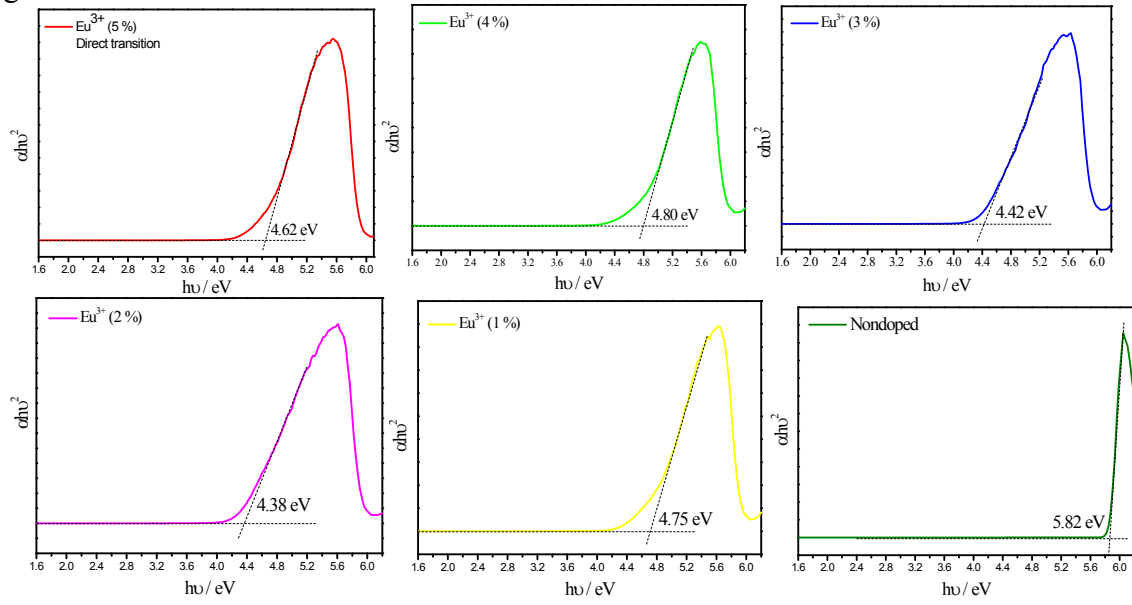



**Figure ES5**

**Figure ES5.** Kubelka-Munk approximation for  $\text{Ba}_2\text{SiO}_4:\text{Eu}^{3+}(5\%)$  considering direct and indirect transition.

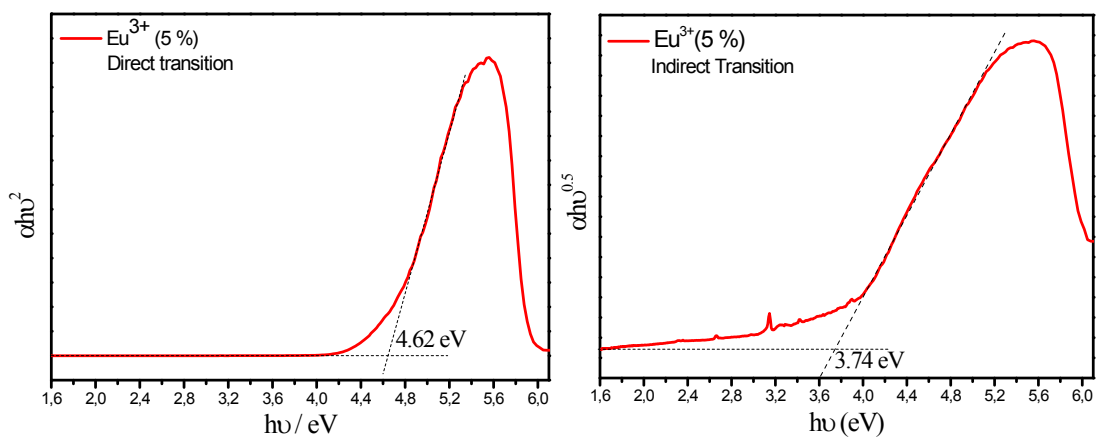

**Figure ES6**

**Figure ES6.** Emission spectra of  $\text{Ba}_2\text{SiO}_4:\text{Eu}^{3+}$  powder samples under 250 nm measured at room temperature.

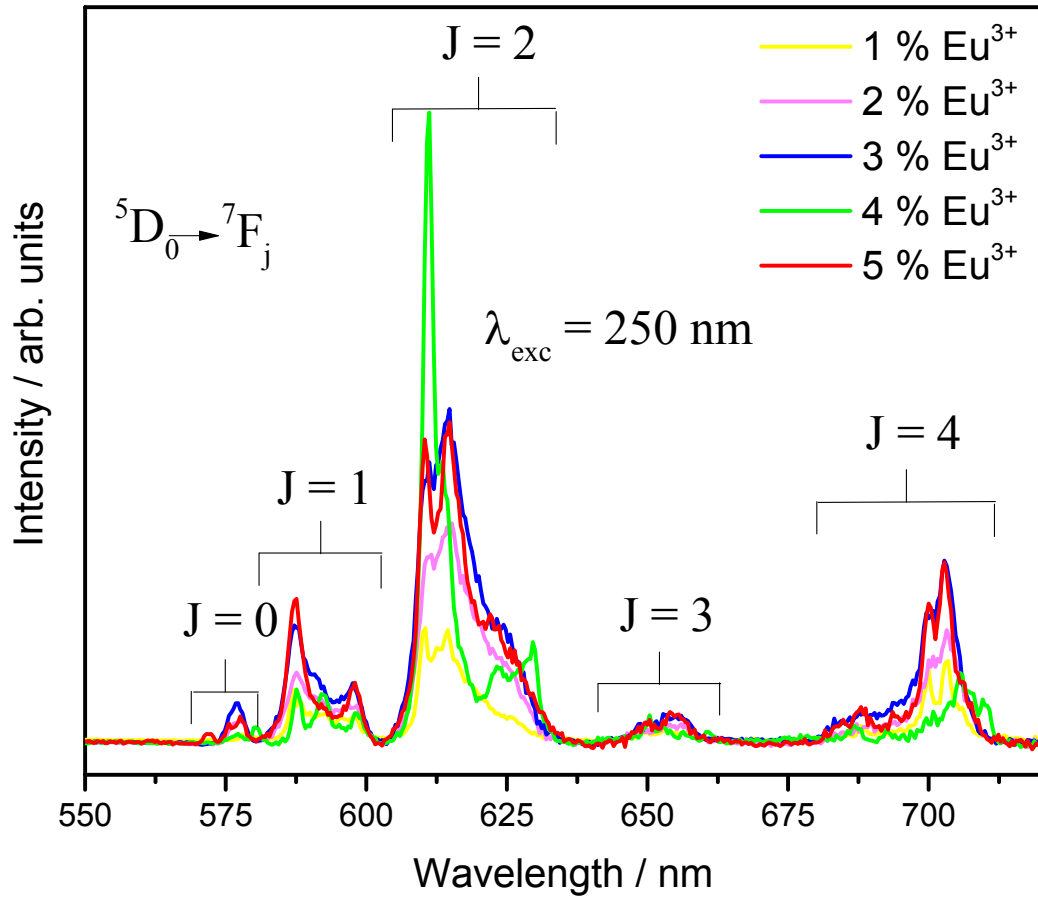

## Figure ES7

**Figure ES7.** Excitation spectra at 77 K of  $\text{Ba}_2\text{SiO}_4:\text{Eu}^{3+}$  samples monitoring the  $\text{Eu}^{3+}$   ${}^7\text{F}_0 \rightarrow {}^5\text{D}_0$  transition upon selective emission in the different  ${}^5\text{D}_0 \rightarrow {}^7\text{F}_2$  components. The lines in the images represents the 0-0 components attributed to  $\text{Eu}^{3+}$  ions replacing  $\text{Ba}^{2+}$  ions in the  $\text{Ba}_2\text{SiO}_4$  network. In the 5 % doped sample, is not possible to see the 0-0 component for the  $\text{Eu}^{3+}-\text{O}^{2-}$  associate probably because the 0-2 lines is very weak, since it is governed by a different transition mechanism.

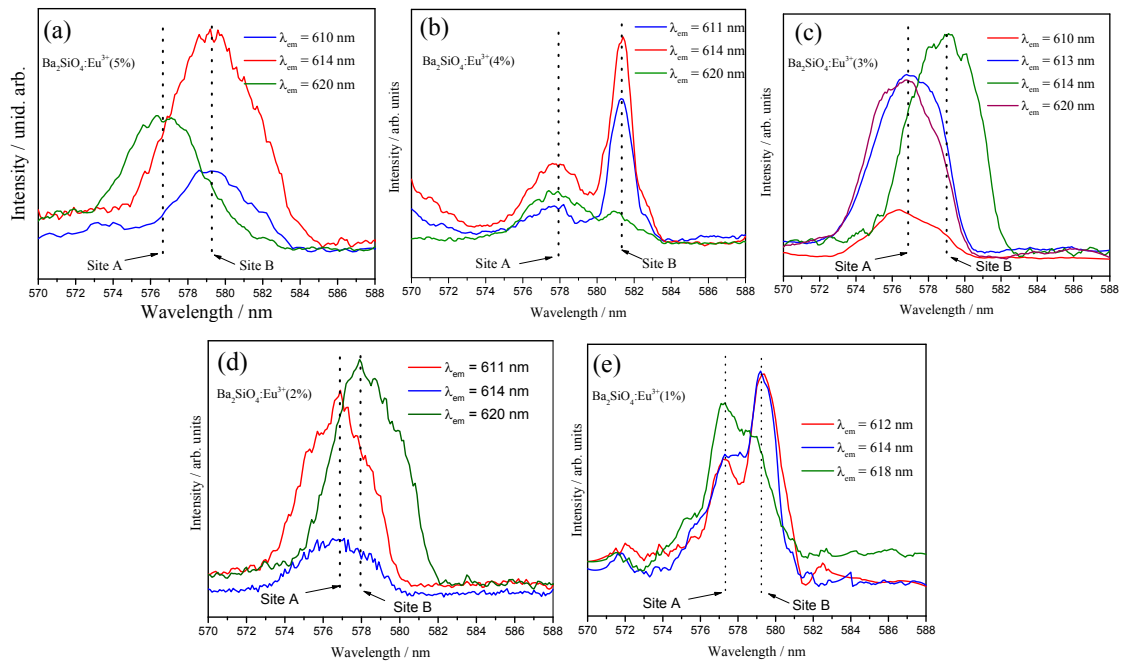

**Figure ES8**

**Figure ES8.** (a) Luminescence decay curves fixing excitation wavelength at 394 nm ( ${}^7F_0 \rightarrow {}^5L_6$ ) and emission wavelength at 614 nm ( ${}^5D_0 \rightarrow {}^7F_2$ ), and (b)  $\ln$  of intensity, for all  $\text{Ba}_2\text{SiO}_4:\text{Eu}^{3+}$  samples.

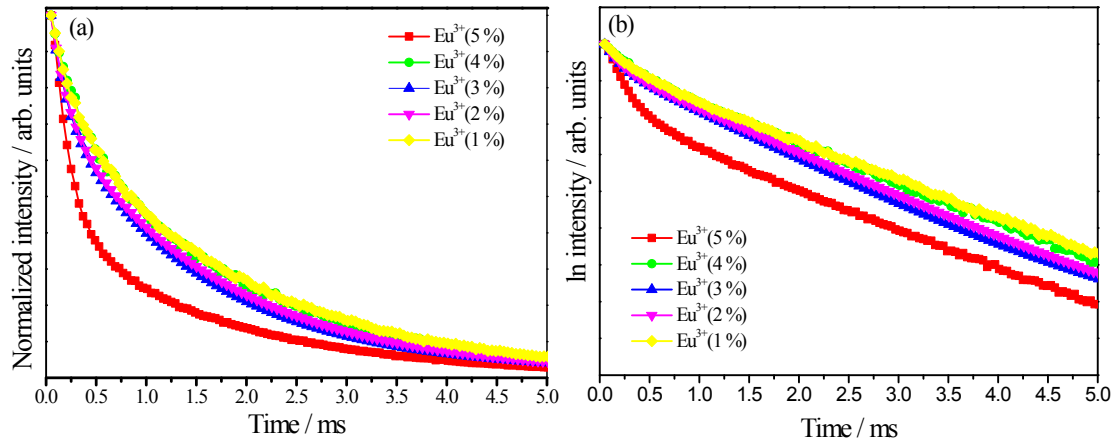

### Figure ES9

**Figure ES9.** CIE chromaticity diagram for  $\text{Ba}_2\text{SiO}_4:\text{Eu}^{3+}(1-5)$  obtained from Spectra Lux software<sup>2</sup>, and the emission spectra collected under 250 nm excitation measured at room temperature.

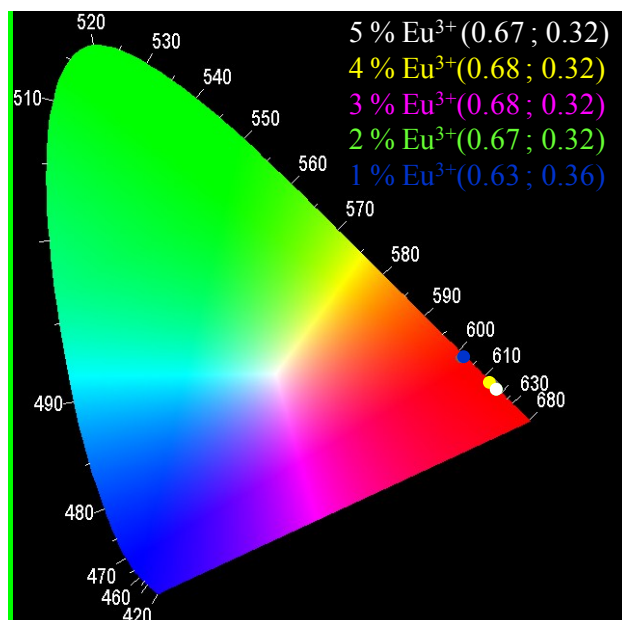

<sup>1</sup> A. L. Patterson, *Phys. Rev.*, **56**, 1939, 978.

<sup>2</sup>P.A. Santa-cruz, F.S. Teles. Spectra Lux Software. Versão 2.0 RENAMI, U. Federal de Pernambuco, 2003.
